# Supplementary material for: Zinc–Copper Imbalance and Lipid Peroxidation Mark Glycaemic Control in Type 2 Diabetes Mellitus
Source: Research Square preprint supplement (doi:10.21203/rs.3.rs-6797345/v1), 2025-06-11
Supplement: Supplementary file 1 [file 7ede690f45dc98a5fae477fe.docx]

**Zinc–Copper Imbalance and Lipid Peroxidation Mark Glycaemic Control in Type 2 Diabetes Mellitus**

Promise Chineye Nwaejigh*, Tamunoibim Jessica Chima-Nwogwugwu, Michael Yusuf Odegbo, Stephen Sunday Udofia

**(Questionnaire)**

STUDY TITLE: **ZINC–COPPER IMBALANCE AND LIPID PEROXIDATION MARK GLYCAEMIC CONTROL IN TYPE 2 DIABETES MELLITUS**

## SECTION B: SOCIODEMOGRAPHIC INFORMATION

Age (in years): __________________

Sex: ☐ Male ☐ Female ☐ Other

Marital status: ☐ Single ☐ Married ☐ Divorced ☐ Widowed

Educational level: ☐ No formal education ☐ Primary ☐ Secondary ☐ Tertiary ☐ Postgraduate

Occupation: __________________

Residential location: ☐ Urban ☐ Semi-urban ☐ Rural

Monthly income (optional): ☐ <₦50,000 ☐ ₦50,000–₦100,000 ☐ ₦100,001–₦200,000 ☐ >₦200,000

## SECTION C: MEDICAL HISTORY AND EXCLUSION CRITERIA

Have you ever been diagnosed with Type 1 Diabetes? ☐ Yes ☐ No

Have you been diagnosed with gestational diabetes or currently pregnant? ☐ Yes ☐ No

Have you ever been diagnosed with chronic kidney disease? ☐ Yes ☐ No

Do you currently have liver dysfunction or liver disease? ☐ Yes ☐ No

Have you experienced any cardiovascular events (e.g., heart attack, stroke) in the past 6 months? ☐ Yes ☐ No

Do you currently have any infections (e.g., fever, cough, UTI, etc.)? ☐ Yes ☐ No

Have you been diagnosed with an inflammatory disorder (e.g., rheumatoid arthritis, lupus)? ☐ Yes ☐ No

Have you been diagnosed with any form of cancer? ☐ Yes ☐ No

Have you taken any vitamin or mineral supplements (especially zinc or copper) in the last 3 months? ☐ Yes ☐ No

Do you currently smoke cigarettes or use tobacco products? ☐ Yes ☐ No

Do you consume alcohol regularly or have a history of alcohol dependence? ☐ Yes ☐ No

## SECTION D: DIABETES STATUS AND CLINICAL INFORMATION

When were you first diagnosed with diabetes? Year: _______

What type of diabetes were you diagnosed with? ☐ Type 2 Diabetes ☐ Others (specify): ______

Are you currently on treatment for diabetes? ☐ Yes ☐ No

Type of diabetes medication: ☐ Oral hypoglycemic agents ☐ Insulin ☐ Both ☐ Diet and exercise only

How often do you check your blood glucose? ☐ Daily ☐ Weekly ☐ Monthly ☐ Rarely

Most recent Fasting Plasma Glucose (FPG) (if known): _______ mmol/L

Most recent HbA1c result (if known): _______ %

Do you have a family history of diabetes? ☐ Yes ☐ No

Any diabetes-related complications? ☐ Neuropathy ☐ Retinopathy ☐ Nephropathy ☐ None ☐ Others: ______

## SECTION E: LIFESTYLE AND DIETARY INFORMATION

How often do you consume fruits and vegetables? ☐ Daily ☐ 2–4 times/week ☐ Rarely ☐ Never

How often do you eat red meat? ☐ Daily ☐ 2–4 times/week ☐ Rarely ☐ Never

Do you consume foods high in fat/oil (e.g., fried foods, pastries)? ☐ Frequently ☐ Occasionally ☐ Rarely

How often do you consume seafood/shellfish? ☐ Frequently ☐ Occasionally ☐ Rarely ☐ Never

Do you engage in regular physical activity (≥3 times/week)? ☐ Yes ☐ No

Type of physical activity (if any): ☐ Walking ☐ Jogging ☐ Gym/Resistance training ☐ Other: _______

## SECTION F: ANTHROPOMETRIC AND CLINICAL MEASUREMENTS

Weight: ______ kg

Height: ______ m

BMI (calculated): ______ kg/m²

Waist circumference: ______ cm

Systolic BP: ______ mmHg Diastolic BP: ______ mmHg

## SECTION G: SAMPLE AND LABORATORY INFORMATION

Date of blood sample collection: ____ / ____ / ______

Fasting duration before sample: ______ hours

Sample ID/Code: __________________

Laboratory tests performed: ☐ FPG ☐ HbA1c ☐ Serum Zinc ☐ Serum Copper ☐ MDA ☐ 8-iso-PGF2α ☐ Lipid profile ☐ Others: _______

**Supplementary Figure S1 (Questionnaire)**

**Supplementary Table S1:**Principal Component Analysis (PCA) loadings and explained variance for trace elements and oxidative stress biomarkers.

.

**Variables component loading**

8-iso-Postaglandin factor 2α (pg/mL) 0.939

Malondialdehyde (µmol/L) 0.879

Copper (µmol/L) 0.932

Zinc (µmol/L) - 0.913

Zinc/Copper ratio - 0.974

Component Eigenvalue % Variance explained Cumulative %

PC1 4.307 86.13 86.13

Note: One principal component (PC1) was retained, explaining over 86.13% of the total variance. Strong positive and negative loadings reflect collinearity among oxidative stress biomarkers and trace elements, justifying dimensionality reduction.


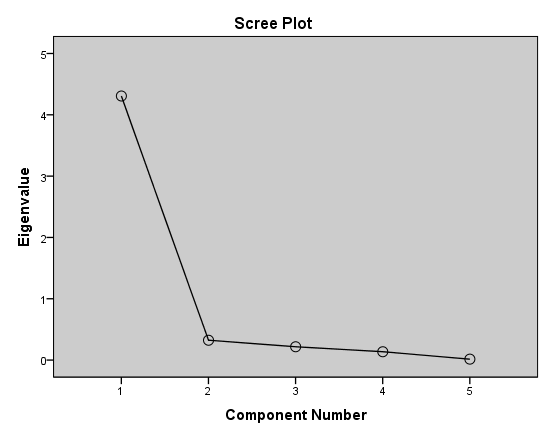


**Supplementary Figure S2:** Scree plot showing only one major component (PC1) extracted from Principal Component Analysis (PCA).
